# Supplementary material
Source: PubMed Central journal article supplement (PMC3889623)
Supplement: JB.01011-13_zjb999092929so1.pdf [file JB.01011-13_zjb999092929so1.pdf]

**Table S1:** Bacterial strains, plasmids, and oligonucleotides used in this study.

| Strain                | Genotype/Phenotype                                                                                                                                                   | Source            |
|-----------------------|----------------------------------------------------------------------------------------------------------------------------------------------------------------------|-------------------|
| DH5 $\alpha$ MCR      | F <sup>-</sup> <i>mcrA</i> ( <i>mrr-hsdRMS-mcrBC</i> )<br>80 <i>dlacZM15</i> ( <i>lacZYAargF</i> )<br>U169 <i>endA1 recA1 supE44</i><br><i>I-thi-1 gyrAa96 relA1</i> | Gibco BRL         |
| BL21 (DE3)            | F <sup>-</sup> <i>ompT hsdS<sub>B</sub>(r<sub>B</sub><sup>-</sup> m<sub>B</sub><sup>-</sup>) gal dcm</i> (DE3)                                                       | Promega           |
| BL21(DE3) <i>ihfA</i> | Deletion of <i>ihfA</i>                                                                                                                                              | Laboratory strain |

| Plasmid     | Description                                                                                                                                               | Reference                      |
|-------------|-----------------------------------------------------------------------------------------------------------------------------------------------------------|--------------------------------|
| pET28_intN1 | <i>intN1</i> under T7 control in pET28                                                                                                                    | (5)                            |
| pJWS200     | pGEM-T containing <i>attN1</i> ; template for site-directed mutagenesis of arm-type sites                                                                 | (10)                           |
| pLR20       | Cointegrate plasmid formed following recombination between pJWS200 ( <i>attN1</i> ) and pJWS14 ( <i>attBT1-1I</i> ); contains <i>attL</i> and <i>attR</i> | L. Rajeev, unpublished results |
| pLR21       | <i>orf2x</i> under T7 control in pET27b                                                                                                                   | L. Rajeev, unpublished results |

| Oligonucleotide     | Sequence (5'-3')                                             | Purpose                                     | Reference                      |
|---------------------|--------------------------------------------------------------|---------------------------------------------|--------------------------------|
| NdeI- <i>orf2x</i>  | CCC GAA GCA TAT<br>GAC AGA CAT ATT<br>GGC AAT TAT CC         | Cloning of Orf2x into overexpression vector | L. Rajeev, unpublished results |
| <i>orf2x</i> -EcoRI | TCG AAT TCT TAG<br>ATT AAA GGA TTG<br>TGT TCA CC             | Cloning of Orf2x into overexpression vector | L. Rajeev, unpublished results |
| LR207 <sup>1</sup>  | CCT TCT GGT AGT<br>GCA CAT TAG AAA<br>GAA ATA CCC TAT<br>AAC | <i>attL</i> amplification                   | L. Rajeev, unpublished results |
| LR200 <sup>1</sup>  | ATA TTT TCC CCA<br>CAT TTT CCC CAC                           | <i>attL</i> and <i>attN1</i> amplification  | L. Rajeev, unpublished         |

|                            |                                                                                   |                                              |                                      |
|----------------------------|-----------------------------------------------------------------------------------|----------------------------------------------|--------------------------------------|
|                            | ATC TGC T                                                                         |                                              | results                              |
| LR193 <sup>1</sup>         | GAC TTA CTG CTA<br>TAT TTT TTG CAC<br>GTG TGG GG                                  | <i>attR</i> an <i>attN1</i><br>amplification | L. Rajeev,<br>unpublished<br>results |
| LR212 <sup>1</sup>         | CGT ATC TTT GCA<br>CCG CAA TTG AGA<br>AAT CAA GC                                  | <i>attR</i> amplification                    | L. Rajeev,<br>unpublished<br>results |
| MM208 <sup>1</sup>         | CAT AGA CTT TCA<br>GGT TGA ATT TTA<br>CTC TGC TGC                                 | <i>attL</i> amplification and<br>sequencing  | This study                           |
| attBT1-1 T4                | TCT TAG CTT TTC<br>GTG GTA CCC AGA<br>C                                           | IntN1 cleavage assays                        | L. Rajeev,<br>unpublished<br>results |
| attBT1-1 bottom            | CAT CCC GGT TCG<br>ACC CCG GGT CTG<br>GGT ACC ACG<br>AAA AG                       | IntN1 cleavage assays                        | L. Rajeev,<br>unpublished<br>results |
| DR1a mut corr <sup>2</sup> | GCT ATA TTT TTT<br>GCG ACG TCG<br>GGG AAA ATG<br>TGG GGA AAA TTC<br>AAG C         | Site-directed<br>mutagenesis of DR1a         | This study                           |
| DR1b mut <sup>2</sup>      | GCA CGT GTG GGG<br>AAA GAC GTC<br>GGA AAA TTC<br>AAG CAA AAG<br>AAA AAG C         | Site-directed<br>mutagenesis of DR1b         | This study                           |
| DR2a mut <sup>2</sup>      | GAA ATA ATT AGA<br>CGT CGG AAA ATG<br>TGG GTA AAA<br>AGA AAA ATG<br>CGG           | Site-directed<br>mutagenesis of DR2a         | This study                           |
| DR2b mut <sup>2</sup>      | GAA ATA ATT AAA<br>GTG GGG AAA<br>GAC GTC GTA AAA<br>AGA AAA ATG<br>CGG           | Site-directed<br>mutagenesis of DR2b         | This study                           |
| DR3a mut <sup>2</sup>      | GCA AAA TAT TTA<br>GCA GGA CGT<br>CGG AAA ATG<br>TGG GGA AAA TAT<br>TTA TAT TTG C | Site-directed<br>mutagenesis of DR3a         | This study                           |
| DR3b mut <sup>2</sup>      | GCA GAT GTG<br>GGG AAA GAC<br>GTC GGA AAA TAT<br>TTA TAT TTG CAG                  | Site-directed<br>mutagenesis of DR3b         | This study                           |

|  |   |  |  |
|--|---|--|--|
|  | C |  |  |
|--|---|--|--|

<sup>1</sup> Primers were ordered with 5' 6-carboxyfluorescein phosphoramidate (FAM) labels and paired with an unlabeled reverse primer for amplification of footprinting substrates.

<sup>2</sup> Only the top strand of each pair of mutagenesis primers is shown.

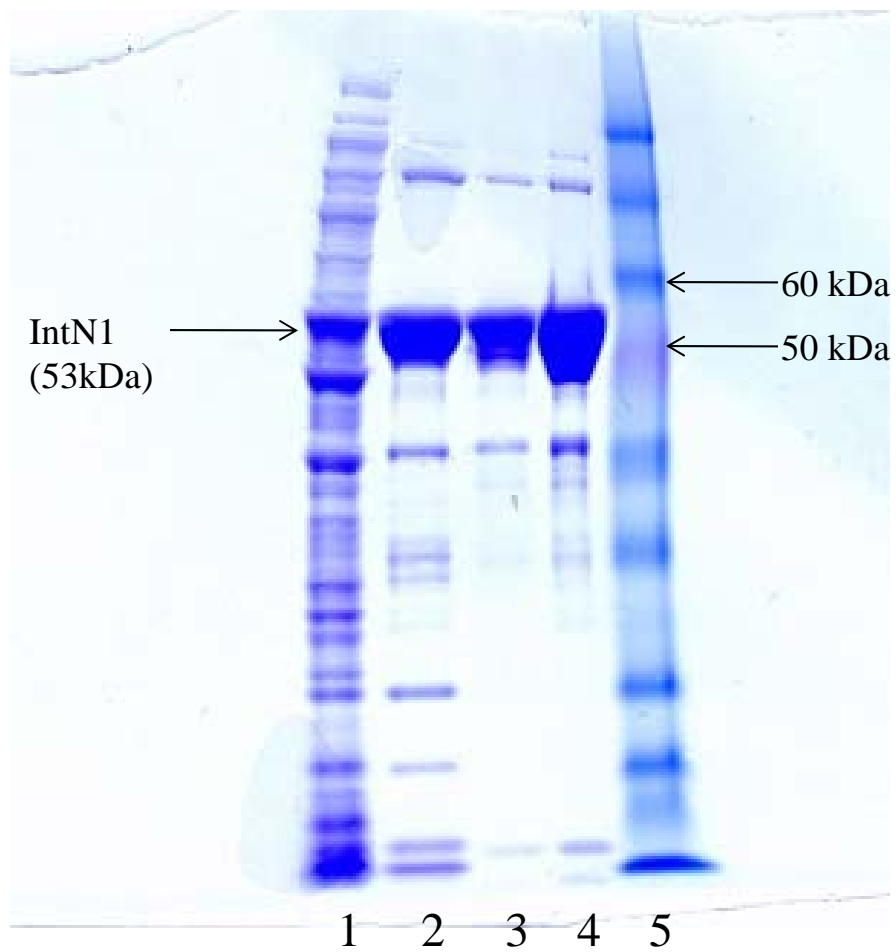

Figure S1: SDS-PAGE analysis of IntN1 protein samples following purification. IntN1 was overexpressed and purified as described in Materials and Methods. The predicted molecular weight of IntN1 is 53 kDa. Lane 1, *E. coli* crude extract containing IntN1; lane 2, IntN1 following heparin-agarose chromatography; lane 3, IntN1 following heparin agarose chromatography and gel filtration chromatography before dialysis into storage buffer; lane 4, IntN1 as described in lane 3 but following dialysis into storage buffer; lane 5, Benchmark ladder (Invitrogen).

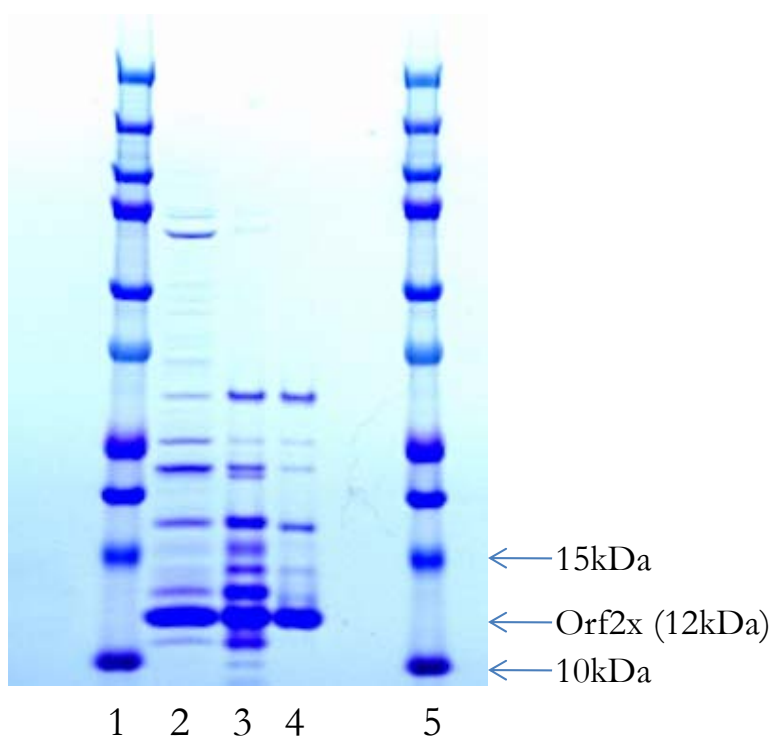

Figure S2A: SDS-PAGE analysis of Orf2x following partial purification. Orf2x was overexpressed in an *ihfA E. coli* background and partially purified as described in Materials and Methods. Lanes 1 and 5, Precision Plus Kaleidoscope Protein Standard (Bio-Rad); Lane 2, Orf2x pellet fraction; Lane 3, Orf2x following heparin-agarose chromatography, Lane 4, Orf2x following heparin and SP cation exchange chromatography.

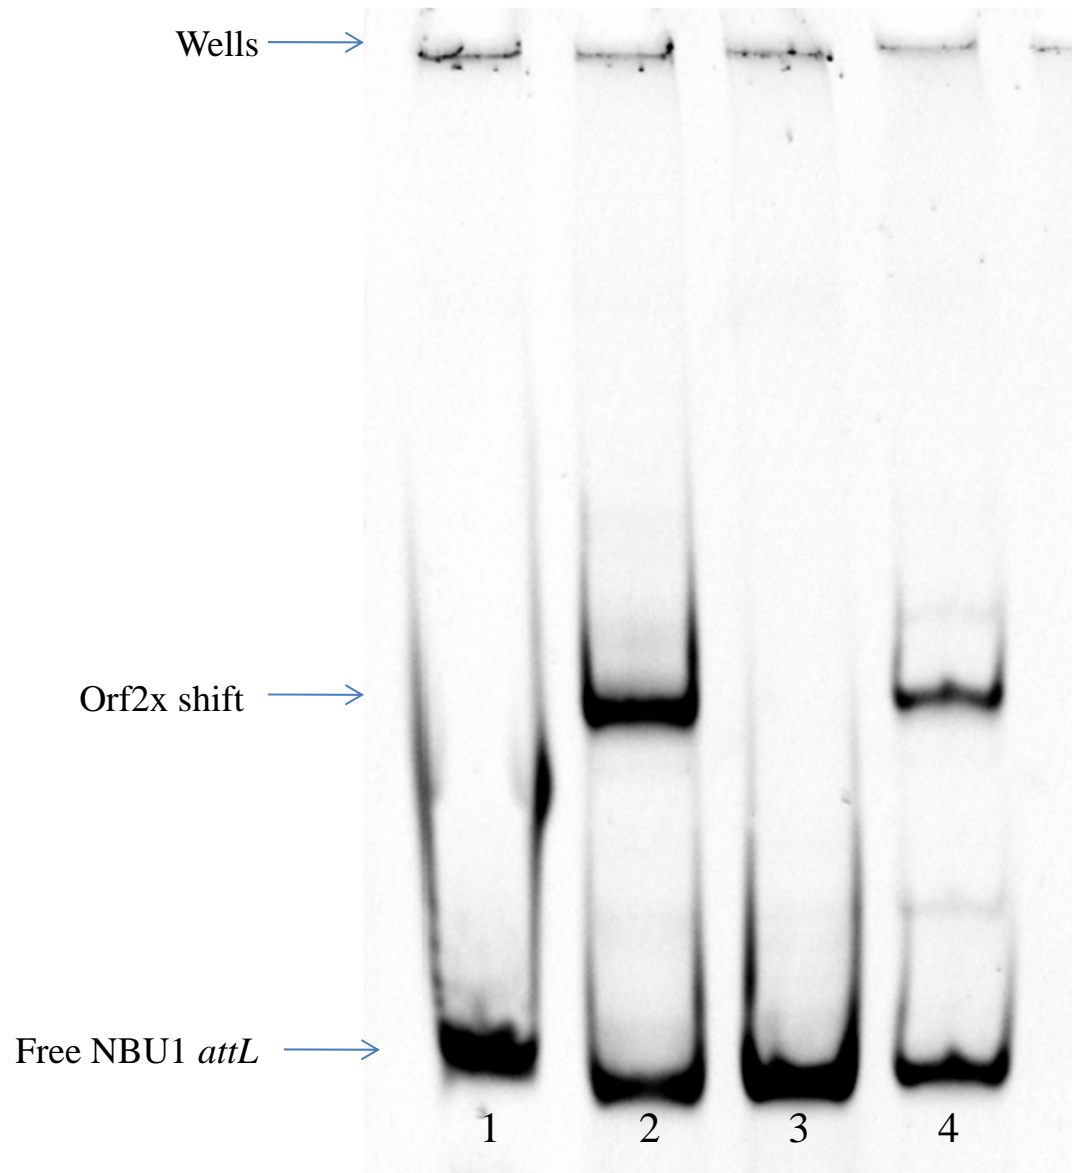

Figure S2B: Gel shift assays with a DNA substrate containing *attL* were used to detect Orf2x activity following purification steps. pET27b empty vector was partially purified using the same protocol and served as a negative control. Lane 1, free *attL* DNA; lane 2, Orf2x (pLR21) extract following heparin-agarose chromatography; lane 3, pET27b extract following heparin and SP chromatography; lane 4, Orf2x (pLR21) extract following heparin and SP chromatography.
